# Supplementary material
Source: PubMed Central journal article supplement (PMC4086741)

## **Pharmacophore Modeling of Nilotinib as an Inhibitor of ABC Drug Transporters and BCR-ABL Kinase Using a 3D-QSAR Approach**

Suneet Shukla<sup>1</sup>, Abdul Kouanda<sup>1</sup>, Latoya Silverton<sup>1</sup>, Tanaji T. Talele<sup>2</sup>, Suresh V. Ambudkar<sup>1\*</sup>

<sup>1</sup>Laboratory of Cell Biology, Center for Cancer Research, National Cancer Institute, NIH, Bethesda, MD 20892

<sup>2</sup>Department of Pharmaceutical Sciences, College of Pharmacy and Health Sciences, St. John's University, Queens, NY 11439

### **Supplementary Information (SI)**

#### **General experimental procedures.**

Samples were analyzed for purity on an Agilent 1200 series LC/MS using a Zorbax Eclipse XBD-C8 reverse phase (5 micron, 4.6 x 150mm) column and a 1.1 mL/min flow rate. A gradient was performed using an acetonitrile/water mobile phase (each containing 0.1% trifluoroacetic acid). The gradient was 4% to 100% acetonitrile over 7 minutes. The purity of final compounds was determined to be >95%, using a two microliter injection with quantitation by AUC at 220 and 254 nanometers. High-res mass spectrometry was performed by the MSU Mass Spectrometry Facility and by the Analytical Chemistry group at the National Center for Advancing Translational Sciences, NIH. The <sup>1</sup>H spectra were recorded on a Varian Inova 400 MHz spectrometer. Chemical shifts are reported in ppm with the solvent resonance as the internal standard (DMSO-*d*<sub>6</sub>: 2.50 ppm, MeOH-*d*<sub>4</sub>: 3.31 ppm). Data are reported as follows: chemical shift, multiplicity (s = singlet, d = doublet, t = triplet, q = quartet, quin = quintet, sep = septet, br = broad, m = multiplet), coupling constants, and number of protons.

### Synthesis of nilotinib and derivatives.

Nilotinib and its derivatives were synthesized by Drs. A.P. Skoumbourdis, D.Y. Duveau and C.J. Thomas (National Center for Advancing Translational Sciences, NIH, Rockville, MD 20850) using published methods as described previously.<sup>1-3</sup> The synthesis of nilotinib and its derivatives NCGC-2, NCGC-4, NCGC-15, NCGC-24, and NCGC-6 (referred as #1, #2, #3, #4 and #5 respectively, in<sup>3</sup>) has been described recently.<sup>3</sup>

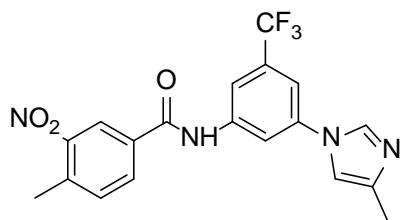

#### 4-methyl-N-(3-(4-methyl-1H-imidazol-1-yl)-5-(trifluoromethyl)phenyl)-3-nitrobenzamide (NCGC-3)

<sup>1</sup>H NMR (400 MHz, DMSO-*d*<sub>6</sub>) δ 8.25 (d, *J* = 1.6 Hz, 1H), 7.81 (d, *J* = 2.0 Hz, 1H), 7.53 (t, *J* = 2.0 Hz, 1H), 7.47 (br. s, 1H), 7.43 (s, 1H), 7.35 (dd, *J* = 7.8, 2.0 Hz, 1H), 6.74 (s, 1H), 6.70 (d, *J* = 7.8 Hz, 2H), 1.85 (s, 3H), 1.60 (s, 3H); LC-MS: RT (min) = 4.53; [M + H]<sup>+</sup> 405.1; HRMS calcd for C<sub>19</sub>H<sub>16</sub>F<sub>3</sub>N<sub>4</sub>O<sub>3</sub> (M + H) 405.1096, found 405.1171.

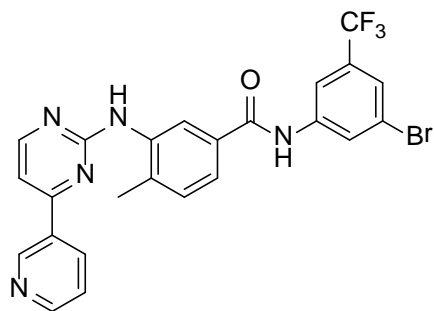

***N*-(3-bromo-5-(trifluoromethyl)phenyl)-4-methyl-3-(4-(pyridine-3-yl)pyrimidin-2-ylamino) benzamide (NCGC-5)**

$^1\text{H}$  NMR (400 MHz, DMSO- $d_6$ )  $\delta$  9.5 (s, 1H), 9.09 (d,  $J$  = 8.2 Hz, 1H), 8.86 (d,  $J$  = 5.1 Hz, 1H), 8.60 (d,  $J$  = 5.1 Hz, 1H), 8.42 (s, 1H), 8.27 (s, 1H), 8.10 (s, 1H), 8.01 (m, 1H), 7.72 (m, 1H), 7.57 (s, 1H), 7.51 (d,  $J$  = 5.1 Hz, 1H), 7.44 (d,  $J$  = 7.8 Hz, 1H), 2.42 (s, 3H); LC-MS: RT (min) = 5.73;  $[\text{M} + \text{H}]^+$  528.1; HRMS calc. for  $\text{C}_{24}\text{H}_{18}\text{BrF}_3\text{N}_5\text{O}$  (M + H) 528.0569, found 528.0647.

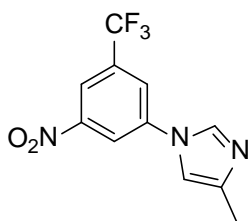

**4-methyl-1-(3-nitro-5-(trifluoromethyl)phenyl)-1H-imidazole (NCGC-7)**

$^1\text{H}$  NMR (400 MHz, DMSO- $d_6$ )  $\delta$  8.74 (t,  $J$  = 2.2 Hz, 1H), 8.51 (d,  $J$  = 1.2 Hz, 2H), 8.37 (m, 1H), 7.82 (t,  $J$  = 1.2 Hz, 1H), 2.17 (s, 3H); LC-MS: RT (min) = 3.64;  $[\text{M} + \text{H}]^+$  272.1; HRMS calcd for  $\text{C}_{11}\text{H}_9\text{F}_3\text{N}_3\text{O}_2$  (M + H) 272.0569, found 272.0649.

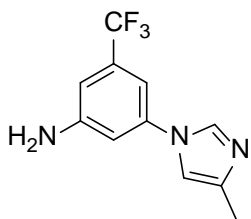

**3-(4-methyl-1H-imidazol-1-yl)-5-(trifluoromethyl)aniline (NCGC-8)**

$^1\text{H}$  NMR (400 MHz, MeOH- $d_4$ )  $\delta$  7.96 (d,  $J$  = 1.2 Hz, 1H), 7.23 (s, 1H), 6.93 (d,  $J$  = 1.6 Hz, 2H), 6.88 (s, 1H), 2.23 (s, 3H); LC-MS: RT (min) = 3.48;  $[\text{M} + \text{H}]^+$  242.1; HRMS calcd for  $\text{C}_{11}\text{H}_{11}\text{F}_3\text{N}_3$  (M + H) 242.0827, found 242.0905.

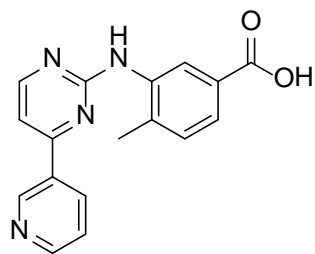

**4-methyl-3-(4-(pyridine-3-yl)pyrimidin-2-ylamino)benzoic acid (NCGC-9)**

$^1\text{H}$  NMR (400 MHz,  $\text{DMSO-}d_6$ )  $\delta$  9.26 (d,  $J = 1.6$  Hz, 1H), 9.01 (s, 1H), 8.68 (dd,  $J = 4.7, 1.6$  Hz, 1H), 8.53 (d,  $J = 5.1$  Hz, 1H), 8.44 (dt,  $J = 8.1, 1.8$  Hz, 1H), 8.23 (s, 1H), 7.62 (dd,  $J = 7.8, 1.6$  Hz, 1H), 7.52 (dd,  $J = 7.6, 4.9$  Hz, 1H), 7.46 (d,  $J = 5.5$  Hz, 1H), 7.30 (d,  $J = 7.8$  Hz, 1H), 2.31 (s, 3H); LC-MS: RT (min) = 3.72;  $[\text{M} + \text{H}]^+$  307.1; HRMS calcd for  $\text{C}_{17}\text{H}_{15}\text{N}_4\text{O}_2$  (M + H) 307.1117, found 307.1195.

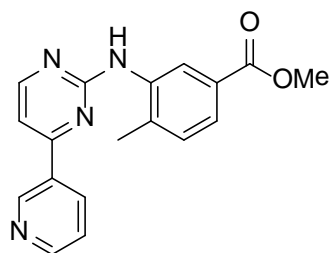

**Methyl 4-methyl-3-(4-(pyridine-3-yl)pyrimidin-2-ylamino)benzoate (NCGC-10)**

$^1\text{H}$  NMR (400 MHz,  $\text{CDCl}_3$ )  $\delta$  9.29 (s, 1H), 9.03 (s, 1H), 8.68 (d,  $J = 3.2$  Hz, 1H), 8.53 (d,  $J = 4.8$  Hz, 1H), 8.42 (d,  $J = 7.2$ , 2H), 7.62 (d,  $J = 7.6$ , 1H), 7.51 (dd,  $J = 4.8, 8.0$  Hz, 1H), 7.46 (d,  $J = 5.2$ , 1H), 7.35 (d,  $J = 7.6$ , 1H), 3.84 (s, 3H), 2.33 (s, 3H); LC-MS: RT (min) = 4.08;  $[\text{M} + \text{H}]^+$  321.1; HRMS calcd for  $\text{C}_{18}\text{H}_{17}\text{N}_4\text{O}_2$  (M + H) 321.1273, found 321.1352.

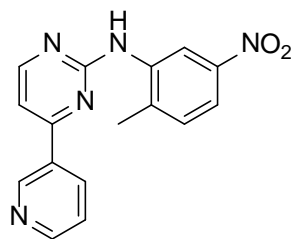

**N-(2-methyl-5-nitrophenyl)-4-(pyridin-3-yl)pyrimidin-2-amine (NCGC-11)**

$^1\text{H}$  NMR (400 MHz,  $\text{DMSO-}d_6$ )  $\delta$  9.30 (s, 1H), 9.21 (s, 1H), 8.78 (s, 1H), 8.69 (d,  $J = 4.0$  Hz, 1H), 8.32 (d,  $J = 5.2$  Hz, 1H), 8.46 (d,  $J = 8.0$  Hz, 1H), 7.88 (d,  $J = 6.8$  Hz, 1H), 7.57-7.49 (m, 3H), 2.41 (s, 3H); LC-MS: RT (min) = 4.40;  $[\text{M} + \text{H}]^+$  308.1; HRMS calcd for  $\text{C}_{16}\text{H}_{14}\text{N}_5\text{O}_2$  (M + H) 308.1069, found 308.1147

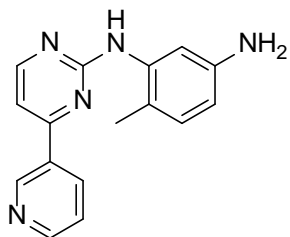

**N-(2-methyl-5-aminophenyl)-4-(pyridin-3-yl)pyrimidin-2-amine (NCGC-12)**

$^1\text{H}$  NMR (400 MHz,  $\text{MeOH-}d_4$ )  $\delta$  9.20 (d,  $J = 1.6$  Hz, 1H), 8.60 (dd,  $J = 1.6, 5.2$  Hz, 1H), 8.47 (dt,  $J = 8.0, 1.6$  Hz, 1H), 8.38 (d,  $J = 5.2$  Hz, 1H), 7.52 (dd,  $J = 8.0, 5.2$  Hz, 1H), 7.26 (d,  $J = 5.6$ , 1H), 7.1 (d,  $J = 2.4$  Hz, 1H), 6.96 (d,  $J = 8.4$  Hz, 1H), 6.51 (dd,  $J = 8.0, 2.4$  Hz, 1H), 2.15 (s, 3H); LC-MS: RT (min) = 2.86;  $[\text{M} + \text{H}]^+$  278.1; HRMS calcd for  $\text{C}_{16}\text{H}_{16}\text{N}_5$  (M + H) 278.1327, found 278.1406.

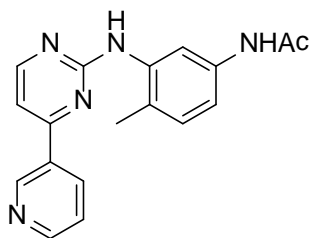

**N-(2-methyl-5-acetylamino phenyl)-4-(pyridin-3-yl)pyrimidin-2-amine (NCGC-13)**

$^1\text{H}$  NMR (400 MHz,  $\text{DMSO-}d_6$ )  $\delta$  9.81 (s, 1H), 9.21 (d,  $J = 1.6$  Hz, 1H), 8.87 (s, 1H), 8.64 (dd,  $J = 4.8, 1.6$  Hz, 1H), 8.44 (d,  $J = 5.2$  Hz, 1H), 8.39 (ddd,  $J = 7.6, 2.4, 2.0$  Hz, 1H), 7.80 (d,  $J = 2.0$  Hz, 1H), 7.48 (dd,  $J = 8.0, 4.8$  Hz, 1H), 7.36 (d,  $J = 5.2$  Hz, 1H), 7.23 (dd,  $J = 8.0, 2.0$  Hz, 1H),

7.08 (d,  $J = 8.4$  Hz, 1H), 2.13 (s, 3H), 1.98 (s, 3H); LC-MS: RT (min) = 3.50;  $[M + H]^+$  320.1;

HRMS calcd for  $C_{16}H_{16}N_5$  ( $M + H$ ) 320.3605, found 320.1511.

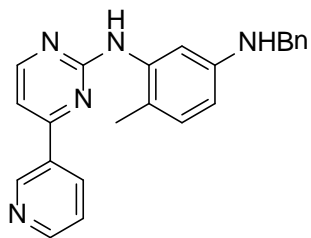

**N-(2-methyl-5-benzylaminophenyl)-4-(pyridin-3-yl)pyrimidin-2-amine (NCGC-14)**

$^1H$  NMR (400 MHz,  $MeOH-d_4$ )  $\delta$  9.22 (s, 1H), 8.61 (s, 1H), 8.45 (ddd,  $J = 8.0, 2.0, 1.6$  Hz, 1H), 8.36 (d,  $J = 5.2$  Hz, 1H), 7.52-7.48 (m, 2H), 7.34-7.14 (m, 5H), 7.04 (d,  $J = 2.4$  Hz, 1H), 6.95 (d,  $J = 8.4$  Hz, 1H), 6.43 (dd,  $J = 8.4, 2.8$  Hz, 1H), 4.28 (s, 2H) 2.14 (s, 3H); LC-MS: RT (min) = 4.14;  $[M + H]^+$  368.1; HRMS calcd for  $C_{23}H_{22}N_5$  ( $M + H$ ) 368.1797, found 368.1877

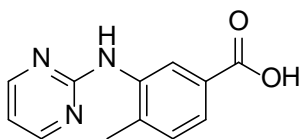

**4-methyl-3-(pyrimidin-2-ylamino) benzoic acid (NCGC-16)**

$^1H$  NMR (400 MHz,  $DMSO-d_6$ )  $\delta$  8.92 (s, 1H), 8.40 (s, 1H), 8.39 (s, 1H), 8.07 (d,  $J = 1.6$  Hz, 1H), 7.62 (dd,  $J = 7.8, 2.0$  Hz, 1H), 7.32 (d,  $J = 7.8$  Hz, 1H), 6.79 (t,  $J = 4.9$  Hz, 1H), 2.27 (s, 3H); LC-MS: RT (min) = 3.59;  $[M + H]^+$  230.1; HRMS calcd for  $C_{12}H_{12}N_3O_2$  ( $M + H$ ) 230.0851, found 230.0930.

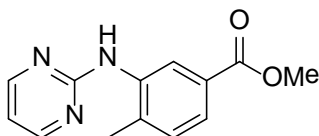

**Methyl 4-methyl-3-(pyrimidin-2-ylamino)benzoate (NCGC-17)**

$^1\text{H}$  NMR (400 MHz, DMSO- $d_6$ )  $\delta$  8.97 (s, 1H), 8.39 (d,  $J = 4.8$  Hz, 1H), 8.05 (d,  $J = 1.6$  Hz, 1H), 7.86 (d,  $J = 1.6$  Hz, 1H), 7.68 (dd,  $J = 7.6, 1.6$  Hz, 1H), 7.61 (dd,  $J = 7.6, 1.6$  Hz, 1H), 7.35 (d,  $J = 8.0$  Hz, 1H), 7.31 (d,  $J = 8.0$  Hz, 1H), 6.78 (t,  $J = 4.8$  Hz, 1H), 3.83 (s, 3H), 2.26 (s, 3H); LC-MS: RT (min) = 4.44;  $[\text{M} + \text{H}]^+$  244.1; HRMS calcd for  $\text{C}_{13}\text{H}_{14}\text{N}_3\text{O}_2$  (M + H) 244.1008, found 244.1086.

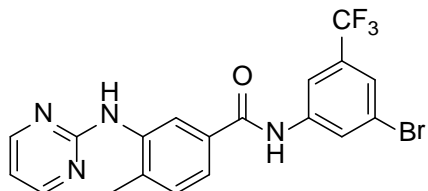

**N-(3-bromo-5-(trifluoromethyl)phenyl)-4-methyl-3-(pyrimidin-2-ylamino)benzamide (NCGC-18)**

$^1\text{H}$  NMR (400 MHz, DMSO- $d_6$ )  $\delta$  10.55 (s, 1H), 8.97 (s, 1H), 8.39 (d,  $J = 4.8$  Hz, 2H), 8.37 (s, 1H), 8.23 (t,  $J = 1.7$  Hz, 1H), 8.12 (d,  $J = 1.8$  Hz, 1H), 7.71 (dd,  $J = 7.9, 1.9$  Hz, 1H), 7.67 (s, 1H), 7.40 (d,  $J = 8.0$  Hz, 1H), 6.79 (t,  $J = 4.8$  Hz, 1H), 2.30 (s, 3H); LC-MS: RT (min) = 6.32;  $[\text{M} + \text{H}]^+$  453.0; HRMS calcd for  $\text{C}_{19}\text{H}_{15}\text{BrF}_3\text{N}_4\text{O}$  (M + H) 451.0303, found 451.0381.

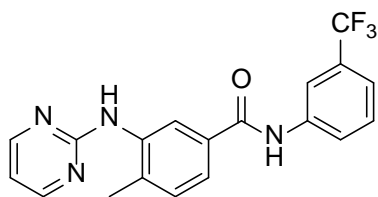

**4-methyl-3-(pyrimidin-2-ylamino)-N-(3-(trifluoromethyl)phenyl)benzamide (NCGC-19)**

$^1\text{H}$  NMR (400 MHz, DMSO- $d_6$ )  $\delta$  10.44 (s, 1H), 8.96 (s, 1H), 8.39 (d,  $J = 4.8$  Hz, 2H), 8.28 – 8.09 (m, 1H), 8.06 (d,  $J = 8.6$  Hz, 1H), 7.71 (dd,  $J = 7.9, 1.9$  Hz, 1H), 7.59 (t,  $J = 8.0$  Hz, 1H), 7.41 (dd,  $J = 20, 7.9$  Hz, 2H), 6.78 (t,  $J = 4.8$  Hz, 1H), 2.29 (s, 3H); LC-MS: RT (min) = 5.65;  $[\text{M} + \text{H}]^+$  373.1; HRMS calcd for  $\text{C}_{19}\text{H}_{16}\text{F}_3\text{N}_4\text{O}$  (M + H) 373.1198, found 373.1276.

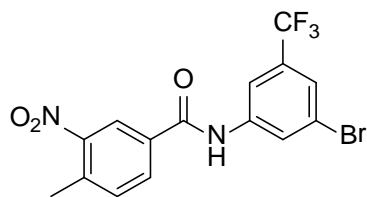

**N-(3-bromo-5-(trifluoromethyl)phenyl)-4-methyl-3-nitrobenzamide (NCGC-20)**

$^1\text{H}$  NMR (400 MHz, DMSO- $d_6$ )  $\delta$  10.84 (s, 1H), 8.61 (d,  $J = 1.9$  Hz, 1H), 8.41 – 8.33 (m, 1H), 8.24 – 8.18 (m, 2H), 7.75 – 7.70 (m, 2H), 2.61 (s, 3H); LC-MS: RT (min) = 7.00;  $[\text{M} + \text{H}]^+$  405.0; HRMS calcd for  $\text{C}_{15}\text{H}_{11}\text{BrF}_3\text{N}_2\text{O}_3$  (M + H) 402.9827, found 402.9897.

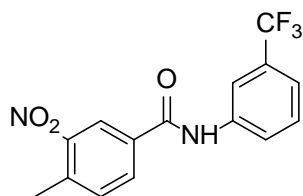

**4-methyl-3-nitro-N-(3-trifluoromethyl)phenylbenzamide (NCGC-21)**

$^1\text{H}$  NMR (400 MHz, DMSO- $d_6$ )  $\delta$  10.44 (s, 1H), 8.36 (d,  $J = 1.9$  Hz, 1H), 8.21 (s, 1H), 7.64 (s, 1H), 7.19 (s, 1H), 7.16 – 7.05 (m, 3H), 2.13 (s, 3H); LC-MS: RT (min) = 6.39;  $[\text{M} + \text{H}]^+$  325.1; HRMS calcd for  $\text{C}_{15}\text{H}_{12}\text{F}_3\text{N}_2\text{O}_3$  (M + H) 325.0722, found 325.0824.

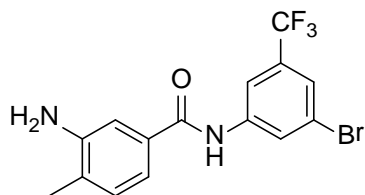

**3-amino-N-(3-bromo-5-(trifluoromethyl)phenyl)-4-methylbenzamide (NCGC-22)**

$^1\text{H}$  NMR (400 MHz, DMSO- $d_6$ )  $\delta$  10.44 (s, 1H), 8.36 (s, 1H), 8.21 (s, 1H), 7.64 (s, 1H), 7.19 (s, 1H), 7.17 – 7.01 (m, 2H), 5.26 (bs, 2H), 2.13 (s, 3H); LC-MS: RT (min) = 5.73;  $[\text{M} + \text{H}]^+$  375.0; HRMS calcd for  $\text{C}_{15}\text{H}_{13}\text{BrF}_3\text{N}_2\text{O}$  (M + H) 373.0085, found 373.0162.



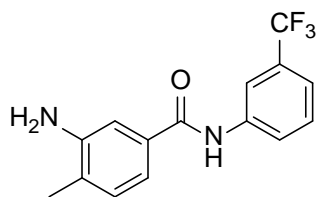

**3-amino-4-methyl-N-(3-trifluoromethyl)phenyl)benzamide (NCGC-23)**

$^1\text{H}$  NMR (400 MHz, DMSO- $d_6$ )  $\delta$  10.34 (s, 1H), 8.25 (bs, 1H), 8.05 (d,  $J = 8.6$  Hz, 1H), 7.57 (t,  $J = 7.8$  Hz, 1H), 7.41 (d,  $J = 7.8$  Hz, 1H), 7.20 (d,  $J = 1.6$  Hz, 1H), 7.12-7.05 (m, 2H), 5.10 (s, 2H), 2.12 (s, 3H); LC-MS: RT (min) = 4.97;  $[\text{M} + \text{H}]^+$  295.1; HRMS calcd for  $\text{C}_{15}\text{H}_{14}\text{F}_3\text{N}_2\text{O}$  (M + H) 295.0980, found 295.1058

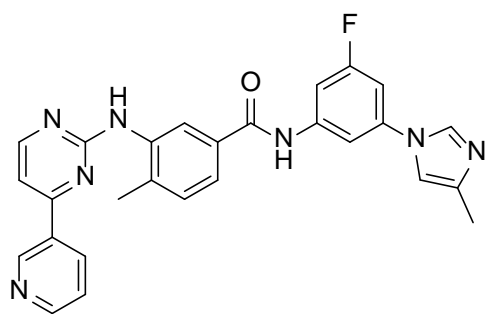

**N-(3-fluoro-5-(4-methyl-1H-imidazol-1-yl)phenyl)-4-methyl-3-((4-(pyridin-3-yl)pyrimidin-2-yl)amino)benzamide (NCGC-25)**

$^1\text{H}$  NMR (400 MHz, DMSO- $d_6$ )  $\delta$  10.69 (s, 1H), 9.52 (d,  $J = 1.7$  Hz, 1H), 9.30 (d,  $J = 2.2$  Hz, 1H), 9.19 (s, 1H), 8.72 (dd,  $J = 4.8, 1.6$  Hz, 1H), 8.56 (d,  $J = 5.2$  Hz, 1H), 8.51 (dt,  $J = 8.0, 2.0$  Hz, 1H), 8.30 (d,  $J = 1.9$  Hz, 1H), 8.12 (s, 1H), 7.95 (d,  $J = 0.6$  Hz, 0H), 7.79 (dt,  $J = 11, 2.1$  Hz, 1H), 7.75 (dd,  $J = 8.1, 2.1$  Hz, 1H), 7.59 (dd,  $J = 8.0, 4.8$  Hz, 1H), 7.50 (d,  $J = 5.1$  Hz, 1H), 7.49 (dt,  $J = 9.3, 2.2$  Hz, 1H), 7.45 (d,  $J = 8.0$ , 1H), 2.36 (s, 3H), 2.35 (s, 3H). LC-MS: RT (min) = 3.64;  $[\text{M} + \text{H}]^+$  480.1; HRMS calcd for  $\text{C}_{27}\text{H}_{23}\text{FN}_7\text{O}$  (M + H), 479.1943; found, 480.1953.

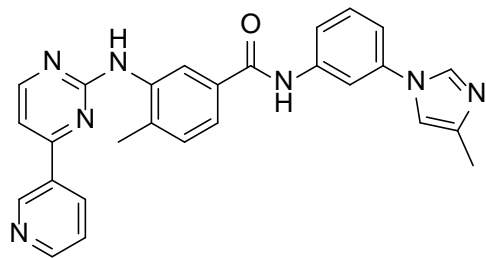

**4-methyl-N-(3-(4-methyl-1H-imidazol-1-yl)phenyl)-3-((4-(pyridin-3-yl)pyrimidin-2-yl)amino)benzamide (NCGC-26)**

$^1\text{H}$  NMR (400 MHz, DMSO- $d_6$ )  $\delta$  10.54 (s, 1H), 9.53 (s, 1H), 9.28 (s, 1H), 9.17 (s, 1H), 8.70 (d,  $J = 4.8$  Hz, 1H), 8.55 (d,  $J = 5.1$  Hz, 1H), 8.48 (d,  $J = 8.0$  Hz, 1H), 8.32 (t,  $J = 2.1$  Hz, 1H), 8.29 (d,  $J = 1.9$  Hz, 1H), 7.95 (s, 1H), 7.81 (d,  $J = 8.4$  Hz, 1H), 7.75 (d,  $J = 7.9$  Hz, 1H), 7.61 (t,  $J = 8.1$  Hz, 1H), 7.58–7.52 (m, 1H), 7.49 (d,  $J = 5.1$  Hz, 1H), 7.47 (m, 1H), 7.44 (d,  $J = 8.4$  Hz, 1H), 2.36 (s, 3H), 2.36 (s, 3H). LC-MS: RT (min) = 3.52;  $[\text{M} + \text{H}]^+$  462.2; HRMS calcd for  $\text{C}_{27}\text{H}_{24}\text{N}_7\text{O}$  (M + H) 462.2037; found, 462.2049.

**References**

1. Wei-Sheng, H.; William, C. S. An efficient synthesis of Nilotinib (AMN107). *Synthesis* **2007**, *14*, 2121-2124.
2. Duveau, D. Y.; Hu, X.; Walsh, M. J.; Shukla, S.; Skoumbourdis, A. P.; Boxer, M. B.; Ambudkar, S. V.; Shen, M.; Thomas, C. J. Synthesis and biological evaluation of analogues of the kinase inhibitor nilotinib as Abl and Kit inhibitors. *Bioorg. Med. Chem. Lett.* **2013**, *23*, 682-686.
3. Shukla, S.; Chufan, E. E.; Singh, S.; Skoumbourdis, A. P.; Kapoor, K.; Boxer, M. B.; Duveau, D. Y.; Thomas, C. J.; Talele, T. T.; Ambudkar, S. V. Elucidation of the structural basis

of interaction of the BCR-ABL kinase inhibitor, nilotinib (Tasigna) with the human ABC drug transporter P-glycoprotein. *Leukemia* **2014**. DOI 10.1038/leu.2014.21.

**Table S1. Angles (°) between pharmacophore feature sites of P-gp, ABCG2 and BCR-ABL kinase inhibitors**

| P-gp, AADDRRR.990 |       |       |       | ABCG2, ADHRRR.12 |       |       |       | BCR-ABL, AADDRRR.2187 |       |       |       |
|-------------------|-------|-------|-------|------------------|-------|-------|-------|-----------------------|-------|-------|-------|
| Site1             | Site2 | Site3 | Angle | Site1            | Site2 | Site3 | Angle | Site1                 | Site2 | Site3 | Angle |
| A5                | A1    | D6    | 52.6  | D7               | A5    | H8    | 67.8  | A5                    | A1    | D6    | 47.5  |
| A5                | A1    | D7    | 28.5  | D7               | A5    | R13   | 60.5  | A5                    | A1    | D7    | 7.1   |
| A5                | A1    | R13   | 33.4  | D7               | A5    | R14   | 54.6  | A5                    | A1    | R13   | 26.6  |
| A5                | A1    | R14   | 32.9  | D7               | A5    | R15   | 112.8 | A5                    | A1    | R14   | 11.7  |
| A5                | A1    | R15   | 69.3  | H8               | A5    | R13   | 7.3   | A5                    | A1    | R15   | 58.4  |
| D6                | A1    | D7    | 57.4  | H8               | A5    | R14   | 122.4 | D6                    | A1    | D7    | 41.0  |
| D6                | A1    | R13   | 26.9  | H8               | A5    | R15   | 48.4  | D6                    | A1    | R13   | 23.5  |
| D6                | A1    | R14   | 80.5  | R13              | A5    | R14   | 115.0 | D6                    | A1    | R14   | 59.0  |
| D6                | A1    | R15   | 21.7  | R13              | A5    | R15   | 55.4  | D6                    | A1    | R15   | 12.7  |
| D7                | A1    | R13   | 30.5  | R14              | A5    | R15   | 161.3 | D7                    | A1    | R13   | 19.5  |
| D7                | A1    | R14   | 27.0  | A5               | D7    | H8    | 83.9  | D7                    | A1    | R14   | 18.7  |
| D7                | A1    | R15   | 78.8  | A5               | D7    | R13   | 67.9  | D7                    | A1    | R15   | 52.3  |
| R13               | A1    | R14   | 54.8  | A5               | D7    | R14   | 77.0  | R13                   | A1    | R14   | 38.2  |
| R13               | A1    | R15   | 48.4  | A5               | D7    | R15   | 45.7  | R13                   | A1    | R15   | 35.9  |
| R14               | A1    | R15   | 100.2 | H8               | D7    | R13   | 16.0  | R14                   | A1    | R15   | 69.5  |
| A1                | A5    | D6    | 74.7  | H8               | D7    | R14   | 160.7 | A1                    | A5    | D6    | 75.4  |
| A1                | A5    | D7    | 85.2  | H8               | D7    | R15   | 41.4  | A1                    | A5    | D7    | 157.1 |
| A1                | A5    | R13   | 83.3  | R13              | D7    | R14   | 144.7 | A1                    | A5    | R13   | 96.5  |
| A1                | A5    | R14   | 93.9  | R13              | D7    | R15   | 27.1  | A1                    | A5    | R14   | 148.2 |
| A1                | A5    | R15   | 48.7  | R14              | D7    | R15   | 120.9 | A1                    | A5    | R15   | 46.1  |
| D6                | A5    | D7    | 88.0  | A5               | H8    | D7    | 28.3  | D6                    | A5    | D7    | 83.3  |
| D6                | A5    | R13   | 29.1  | A5               | H8    | R13   | 9.2   | D6                    | A5    | R13   | 27.8  |
| D6                | A5    | R14   | 141.9 | A5               | H8    | R14   | 21.5  | D6                    | A5    | R14   | 135.7 |
| D6                | A5    | R15   | 29.4  | A5               | H8    | R15   | 61.3  | D6                    | A5    | R15   | 30.1  |
| D7                | A5    | R13   | 60.6  | D7               | H8    | R13   | 19.1  | D7                    | A5    | R13   | 60.7  |
| D7                | A5    | R14   | 54.5  | D7               | H8    | R14   | 6.9   | D7                    | A5    | R14   | 54.4  |
| D7                | A5    | R15   | 98.1  | D7               | H8    | R15   | 87.7  | D7                    | A5    | R15   | 113.4 |
| R13               | A5    | R14   | 115.0 | R13              | H8    | R14   | 12.2  | R13                   | A5    | R14   | 115.0 |
| R13               | A5    | R15   | 52.3  | R13              | H8    | R15   | 70.1  | R13                   | A5    | R15   | 55.8  |
| R14               | A5    | R15   | 138.1 | R14              | H8    | R15   | 81.6  | R14                   | A5    | R15   | 161.5 |
| A1                | D6    | A5    | 52.8  | A5               | R13   | D7    | 51.6  | A1                    | D6    | A5    | 57.1  |

|     |     |     |       |     |     |     |       |     |     |     |       |
|-----|-----|-----|-------|-----|-----|-----|-------|-----|-----|-----|-------|
| A1  | D6  | D7  | 55.7  | A5  | R13 | H8  | 163.5 | A1  | D6  | D7  | 85.4  |
| A1  | D6  | R13 | 66.3  | A5  | R13 | R14 | 34.2  | A1  | D6  | R13 | 82.1  |
| A1  | D6  | R14 | 50.7  | A5  | R13 | R15 | 87.5  | A1  | D6  | R14 | 74.5  |
| A1  | D6  | R15 | 36.8  | D7  | R13 | H8  | 144.9 | A1  | D6  | R15 | 20.9  |
| A5  | D6  | D7  | 28.0  | D7  | R13 | R14 | 17.5  | A5  | D6  | D7  | 28.5  |
| A5  | D6  | R13 | 33.0  | D7  | R13 | R15 | 134.7 | A5  | D6  | R13 | 31.5  |
| A5  | D6  | R14 | 15.3  | H8  | R13 | R14 | 162.3 | A5  | D6  | R14 | 17.5  |
| A5  | D6  | R15 | 81.9  | H8  | R13 | R15 | 76.7  | A5  | D6  | R15 | 75.0  |
| D7  | D6  | R13 | 10.6  | R14 | R13 | R15 | 119.8 | D7  | D6  | R13 | 16.8  |
| D7  | D6  | R14 | 13.1  | A5  | R14 | D7  | 48.5  | D7  | D6  | R14 | 12.7  |
| D7  | D6  | R15 | 92.1  | A5  | R14 | H8  | 36.2  | D7  | D6  | R15 | 103.5 |
| R13 | D6  | R14 | 20.7  | A5  | R14 | R13 | 30.7  | R13 | D6  | R14 | 23.9  |
| R13 | D6  | R15 | 102.7 | A5  | R14 | R15 | 11.3  | R13 | D6  | R15 | 102.5 |
| R14 | D6  | R15 | 85.0  | D7  | R14 | H8  | 12.4  | R14 | D6  | R15 | 91.5  |
| A1  | D7  | A5  | 66.3  | D7  | A5  | H8  | 67.8  | A1  | D7  | A5  | 15.8  |
| A1  | D7  | D6  | 66.9  | D7  | A5  | R13 | 60.5  | A1  | D7  | D6  | 53.6  |
| A1  | D7  | R13 | 76.9  | D7  | A5  | R14 | 54.6  | A1  | D7  | R13 | 52.0  |
| A1  | D7  | R14 | 92.1  | D7  | A5  | R15 | 112.8 | A1  | D7  | R14 | 92.7  |
| A1  | D7  | R15 | 42.1  | H8  | A5  | R13 | 7.3   | A1  | D7  | R15 | 31.2  |
| A5  | D7  | D6  | 64.0  | H8  | A5  | R14 | 122.4 | A5  | D7  | D6  | 68.2  |
| A5  | D7  | R13 | 67.8  | H8  | A5  | R15 | 48.4  | A5  | D7  | R13 | 67.7  |
| A5  | D7  | R14 | 77.0  | R13 | A5  | R14 | 115.0 | A5  | D7  | R14 | 77.0  |
| A5  | D7  | R15 | 57.4  | R13 | A5  | R15 | 55.4  | A5  | D7  | R15 | 45.2  |
| D6  | D7  | R13 | 10.1  | R14 | A5  | R15 | 161.3 | D6  | D7  | R13 | 15.9  |
| D6  | D7  | R14 | 140.4 | A5  | D7  | H8  | 83.9  | D6  | D7  | R14 | 142.5 |
| D6  | D7  | R15 | 25.0  | A5  | D7  | R13 | 67.9  | D6  | D7  | R15 | 23.0  |
| R13 | D7  | R14 | 144.6 | A5  | D7  | R14 | 77.0  | R13 | D7  | R14 | 144.7 |
| R13 | D7  | R15 | 35.0  | A5  | D7  | R15 | 45.7  | R13 | D7  | R15 | 27.4  |
| R14 | D7  | R15 | 123.6 | H8  | D7  | R13 | 16.0  | R14 | D7  | R15 | 120.4 |
| A1  | R13 | A5  | 63.3  |     |     |     |       | A1  | R13 | A5  | 56.9  |
| A1  | R13 | D6  | 86.8  |     |     |     |       | A1  | R13 | D6  | 74.4  |
| A1  | R13 | D7  | 72.5  |     |     |     |       | A1  | R13 | D7  | 108.5 |
| A1  | R13 | R14 | 68.8  |     |     |     |       | A1  | R13 | R14 | 91.1  |
| A1  | R13 | R15 | 49.3  |     |     |     |       | A1  | R13 | R15 | 36.8  |
| A5  | R13 | D6  | 117.9 |     |     |     |       | A5  | R13 | D6  | 120.7 |

|     |     |     |       |  |  |  |  |     |     |     |       |
|-----|-----|-----|-------|--|--|--|--|-----|-----|-----|-------|
| A5  | R13 | D7  | 51.6  |  |  |  |  | A5  | R13 | D7  | 51.6  |
| A5  | R13 | R14 | 34.2  |  |  |  |  | A5  | R13 | R14 | 34.2  |
| A5  | R13 | R15 | 92.2  |  |  |  |  | A5  | R13 | R15 | 86.9  |
| D6  | R13 | D7  | 159.3 |  |  |  |  | D6  | R13 | D7  | 147.4 |
| D6  | R13 | R14 | 149.1 |  |  |  |  | D6  | R13 | R14 | 144.4 |
| D6  | R13 | R15 | 37.7  |  |  |  |  | D6  | R13 | R15 | 37.8  |
| D7  | R13 | R14 | 17.5  |  |  |  |  | D7  | R13 | R14 | 17.5  |
| D7  | R13 | R15 | 121.6 |  |  |  |  | D7  | R13 | R15 | 134.1 |
| R14 | R13 | R15 | 114.4 |  |  |  |  | R14 | R13 | R15 | 119.2 |
| A1  | R14 | A5  | 53.3  |  |  |  |  | A1  | R14 | A5  | 20.1  |
| A1  | R14 | D6  | 48.9  |  |  |  |  | A1  | R14 | D6  | 46.5  |
| A1  | R14 | D7  | 60.9  |  |  |  |  | A1  | R14 | D7  | 68.6  |
| A1  | R14 | R13 | 56.4  |  |  |  |  | A1  | R14 | R13 | 50.7  |
| A1  | R14 | R15 | 31.0  |  |  |  |  | A1  | R14 | R15 | 28.7  |
| A5  | R14 | D6  | 22.8  |  |  |  |  | A5  | R14 | D6  | 26.8  |
| A5  | R14 | D7  | 48.5  |  |  |  |  | A5  | R14 | D7  | 48.5  |
| A5  | R14 | R13 | 30.7  |  |  |  |  | A5  | R14 | R13 | 30.7  |
| A5  | R14 | R15 | 25.8  |  |  |  |  | A5  | R14 | R15 | 11.1  |
| D6  | R14 | D7  | 26.5  |  |  |  |  | D6  | R14 | D7  | 24.8  |
| D6  | R14 | R13 | 10.2  |  |  |  |  | D6  | R14 | R13 | 11.8  |
| D6  | R14 | R15 | 18.8  |  |  |  |  | D6  | R14 | R15 | 18.4  |
| D7  | R14 | R13 | 17.9  |  |  |  |  | D7  | R14 | R13 | 17.9  |
| D7  | R14 | R15 | 39.6  |  |  |  |  | D7  | R14 | R15 | 42.6  |
| R13 | R14 | R15 | 28.0  |  |  |  |  | R13 | R14 | R15 | 26.0  |
| A1  | R15 | A5  | 62.0  |  |  |  |  | A1  | R15 | A5  | 75.5  |
| A1  | R15 | D6  | 121.5 |  |  |  |  | A1  | R15 | D6  | 146.4 |
| A1  | R15 | D7  | 59.1  |  |  |  |  | A1  | R15 | D7  | 96.5  |
| A1  | R15 | R13 | 82.2  |  |  |  |  | A1  | R15 | R13 | 107.3 |
| A1  | R15 | R14 | 48.8  |  |  |  |  | A1  | R15 | R14 | 81.8  |
| A5  | R15 | D6  | 68.7  |  |  |  |  | A5  | R15 | D6  | 74.9  |
| A5  | R15 | D7  | 24.5  |  |  |  |  | A5  | R15 | D7  | 21.4  |
| A5  | R15 | R13 | 35.5  |  |  |  |  | A5  | R15 | R13 | 37.3  |
| A5  | R15 | R14 | 16.1  |  |  |  |  | A5  | R15 | R14 | 7.4   |
| D6  | R15 | D7  | 62.9  |  |  |  |  | D6  | R15 | D7  | 53.5  |
| D6  | R15 | R13 | 39.6  |  |  |  |  | D6  | R15 | R13 | 39.7  |

|     |     |     |      |  |  |  |  |     |     |     |      |
|-----|-----|-----|------|--|--|--|--|-----|-----|-----|------|
| D6  | R15 | R14 | 76.2 |  |  |  |  | D6  | R15 | R14 | 70.1 |
| D7  | R15 | R13 | 23.3 |  |  |  |  | D7  | R15 | R13 | 18.5 |
| D7  | R15 | R14 | 16.8 |  |  |  |  | D7  | R15 | R14 | 17.0 |
| R13 | R15 | R14 | 37.6 |  |  |  |  | R13 | R15 | R14 | 34.8 |

**Supplementary Figure S1.** Effect of nilotinib and its derivatives on ABCG2- or P-gp-mediated transport. Accumulation of mitoxantrone (ABCG2 substrate) (a, c) and calcein (generated from P-gp substrate calcein-AM) (b, d) was determined in the presence or absence of 10  $\mu$ M of nilotinib or indicated derivatives NCGC-2-NCGC-26 (marked as #2-#26) in ABCG2 and P-gp-expressing MCF7FLV1000 and KBV1 cells, respectively, as described in Experimental Section. 2  $\mu$ M Tariquidar (XR9576, a specific P-gp inhibitor) and 5  $\mu$ M FTC (a specific ABCG2 inhibitor) was used as a positive control to completely inhibit the activity of P-gp and ABCG2 respectively, in these assays. A representative histogram derived from CellQuest, which depicts the fluorescence intensity (log scale, X-axis) of mitoxantrone (a) and calcein (b), the cell number (Y-axis) and the indicated derivative (Z-axis) is shown here. The difference in the fluorescence intensity (accumulation levels) in the absence and presence of FTC or XR9576 (positive-control) inhibitors was taken as 100% activity and activity of the nilotinib or indicated derivative was calculated as % inhibitory activity compared to these controls. The graphs show % ABCG2 (c) or P-gp (d) inhibitory activity and error bars denote SD (n=3; Y-axis) in the presence of nilotinib, FTC, tariquidar or indicated derivative.



Supplementary Figure S1.

(a)

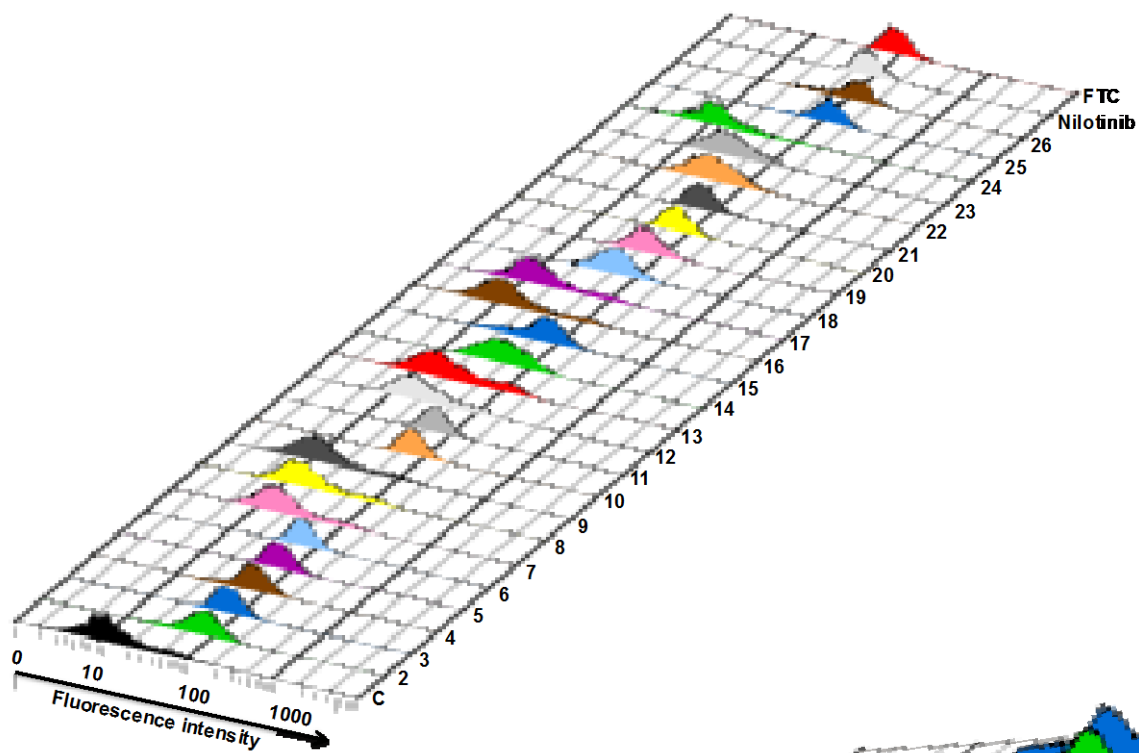

(b)

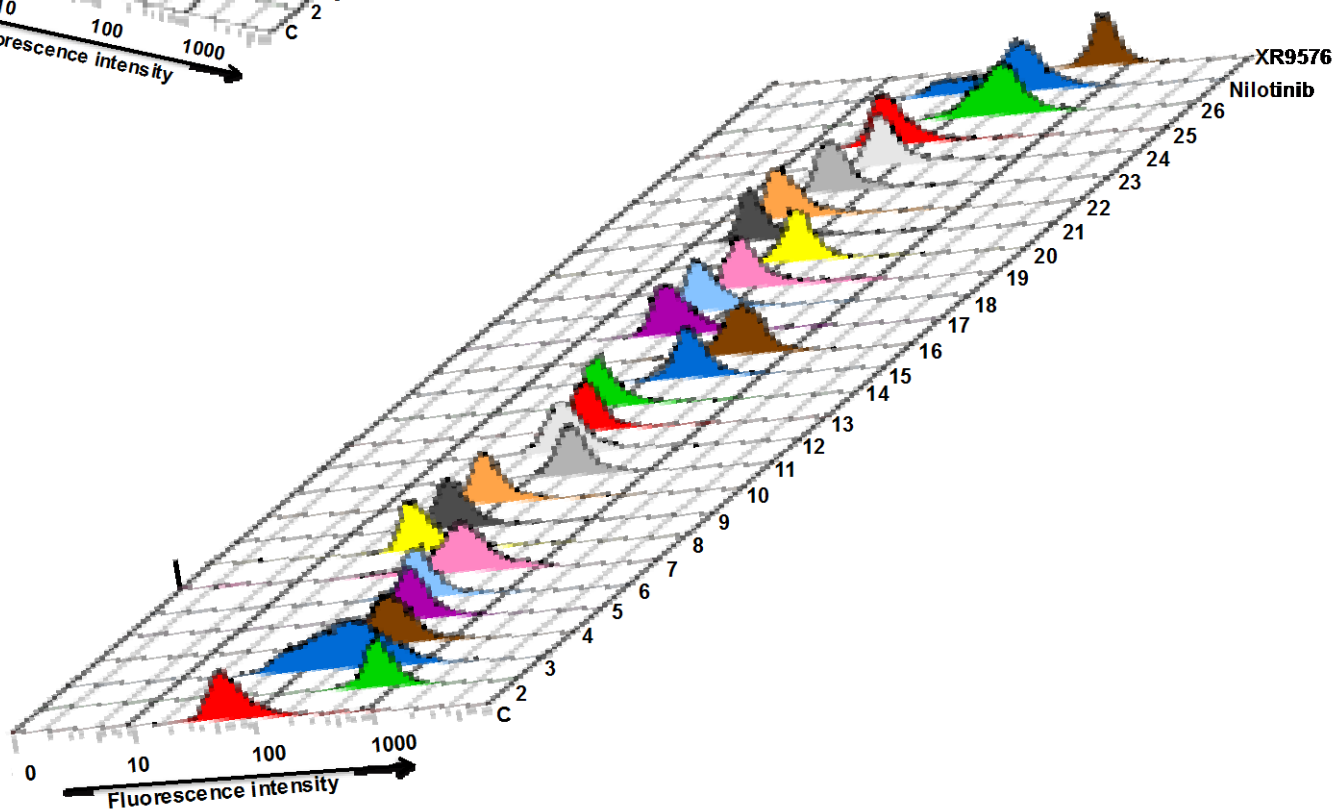

(c)

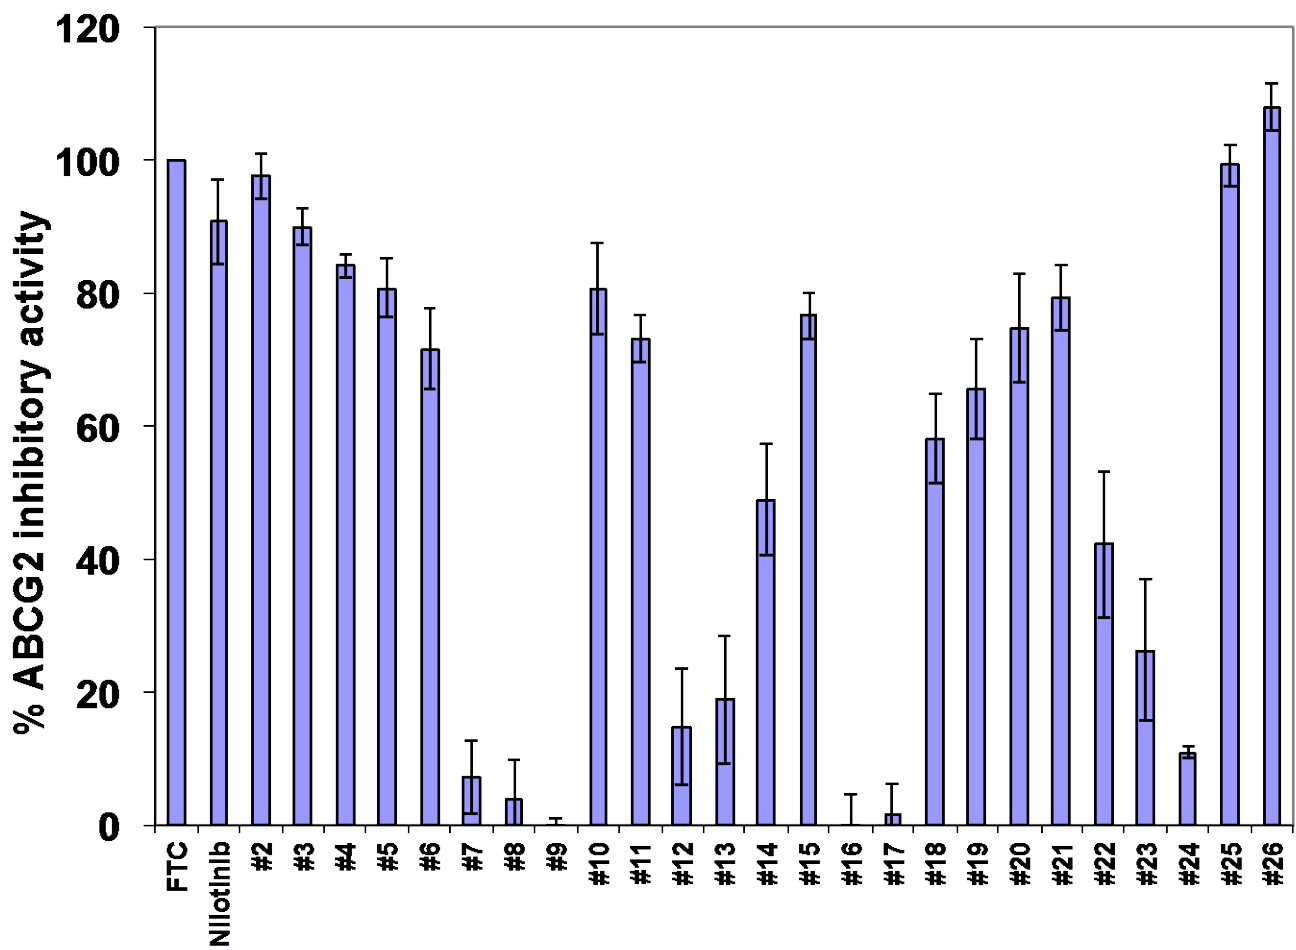

(d)

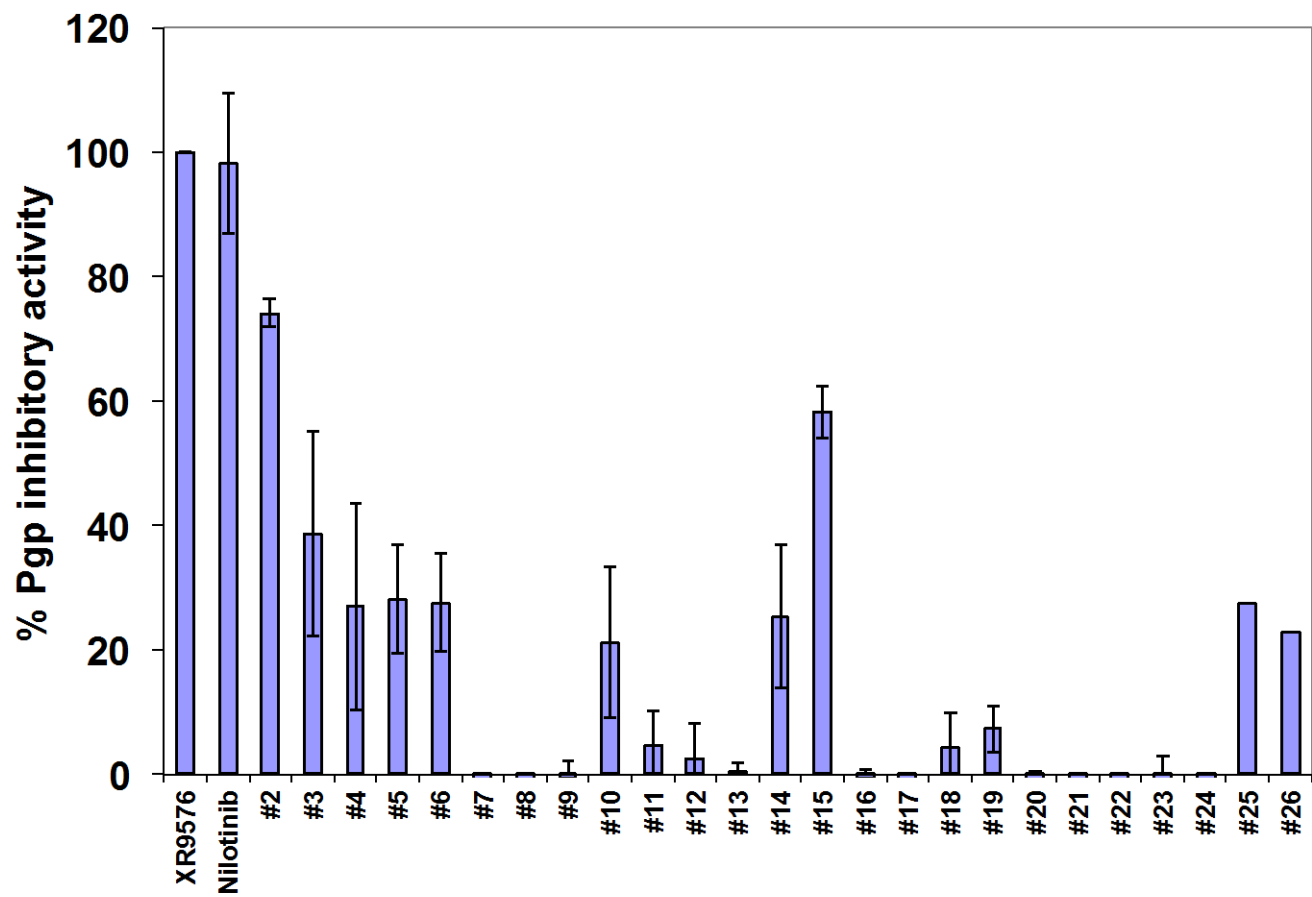

Supplement: mp400762h_si_001.pdf [file mp400762h_si_001.pdf]
